# Supplementary material for: Self-template synthesis of CdS/NiSx heterostructured nanohybrids for efficient photocatalytic hydrogen evolution
Source: Royal Society of Chemistry journal article supplement (doi:10.1039/c7dt00842b), 2017-01-01
Supplement: c7dt00842b1.pdf [file c7dt00842b1.pdf]

## Electronic Supplementary Information

### Self-Template Synthesis of CdS/NiS<sub>x</sub> Heterostructured Nanohybrids for Efficient Photocatalytic Hydrogen Evolution

You Xu, Wenguang Tu, Shengming Yin, Markus Kraft, Qichun Zhang and Rong Xu\*

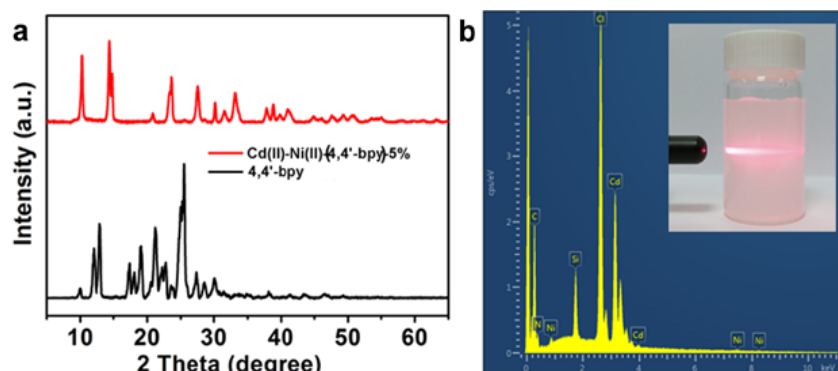

**Fig. S1** (a) XRD patterns of 4,4'-bpy and the Cd(II)-Ni(II)-(4,4'-bpy)-5% coordination polymer. (b) EDX spectrum of the Cd(II)-Ni(II)-(4,4'-bpy)-5% coordination polymer. The inset of (b) is the photograph of the dispersion containing Cd(II)-Ni(II)-(4,4'-bpy)-5% coordination polymer. The light beam is incident from the side to demonstrate the Tyndall effect.

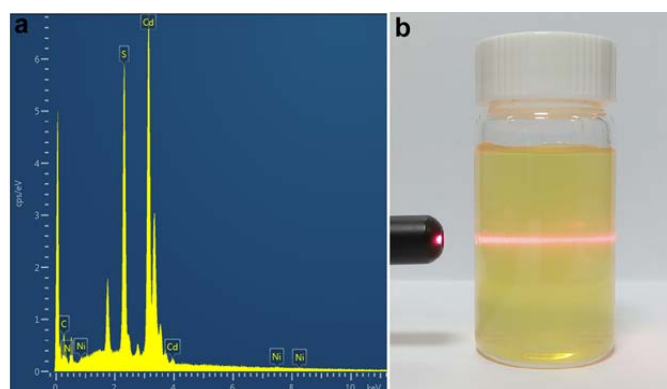

**Fig. S2** (a) EDX spectrum of the CdS/NiS<sub>x</sub>-5% nanohybrid. (b) The photograph of the dispersion containing CdS/NiS<sub>x</sub>-5% nanohybrid. The light beam is incident from the side to demonstrate the Tyndall effect.

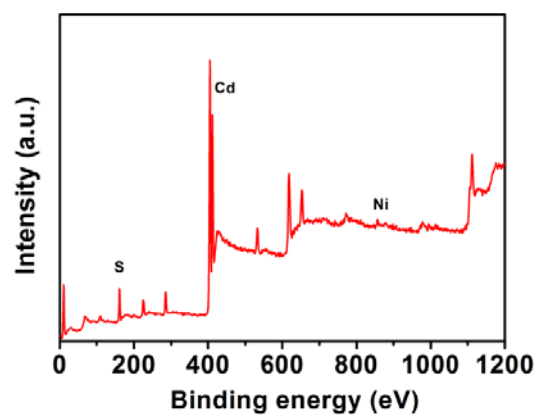

**Fig. S3** XPS survey spectrum of the CdS/NiS<sub>x</sub>-5% nanohybrid.

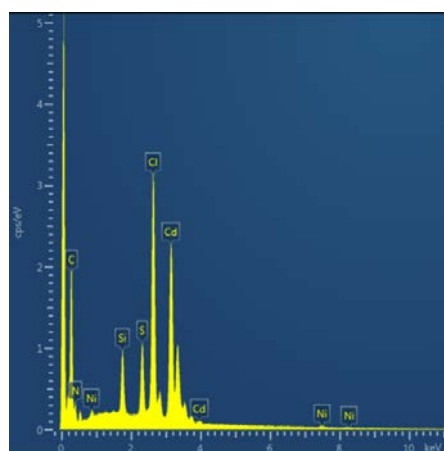

**Fig. S4** EDX spectrum of the intermediate collected after 3 min reaction with S<sup>2-</sup> anions.

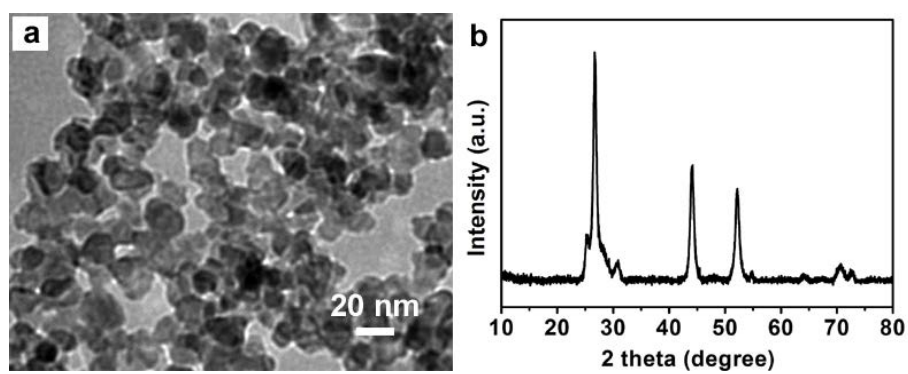

**Fig. S5** (a) TEM image and (b) XRD pattern of CdS/NiS<sub>x</sub>-5% sample obtained at 160 °C under hydrothermal condition.

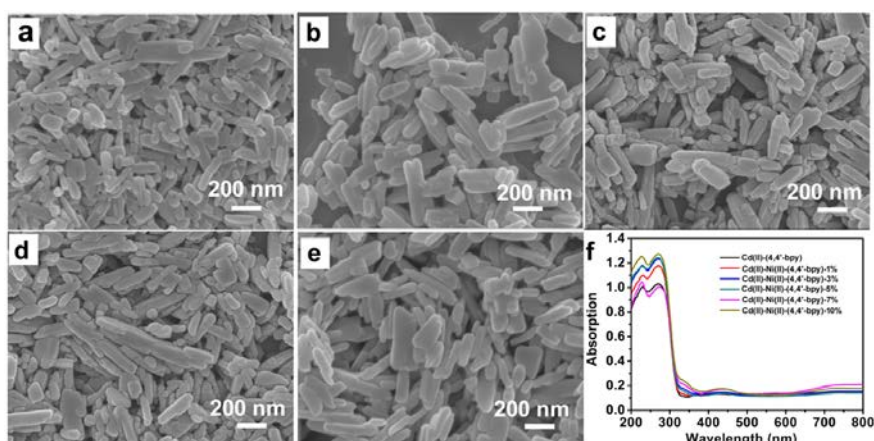

**Fig. S6** (a-e) Cd(II)-(4,4'-bpy) and Cd(II)-Ni(II)-(4,4'-bpy) coordination polymers with different Cd/Ni mole ratios: (a) Cd(II)-(4,4'-bpy), (b) Cd(II)-Ni(II)-(4,4'-bpy)-1%, (c) Cd(II)-Ni(II)-(4,4'-bpy)-3%, (d) Cd(II)-Ni(II)-(4,4'-bpy)-7%, (e) Cd(II)-Ni(II)-(4,4'-bpy)-10%. (f) UV-visible absorption spectra of various Cd(II)-Ni(II)-(4,4'-bpy) coordination polymers.

**Table S1** Ni content in various Cd(II)-Ni(II)-(4,4'-bpy) coordination polymers.

| Samples                      | Ni content in metal precursors (mol%) | Ni content in coordination polymers (mol%) <sup>a</sup> |
|------------------------------|---------------------------------------|---------------------------------------------------------|
| Cd(II)-Ni(II)-(4,4'-bpy)-1%  | 1                                     | 0.95                                                    |
| Cd(II)-Ni(II)-(4,4'-bpy)-3%  | 3                                     | 2.64                                                    |
| Cd(II)-Ni(II)-(4,4'-bpy)-5%  | 5                                     | 4.83                                                    |
| Cd(II)-Ni(II)-(4,4'-bpy)-7%  | 7                                     | 6.43                                                    |
| Cd(II)-Ni(II)-(4,4'-bpy)-10% | 10                                    | 9.35                                                    |

<sup>a</sup> The Ni content was obtained by ICP-AES test.

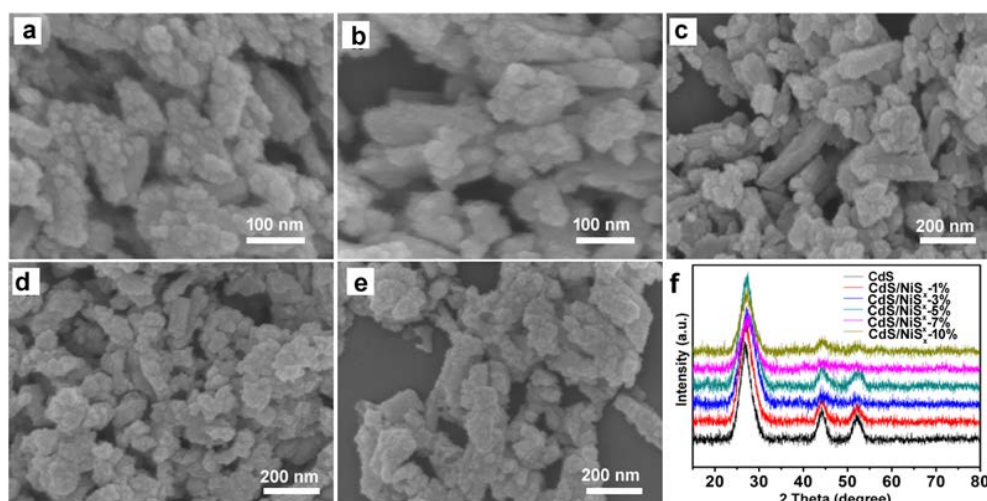

**Fig. S7** (a-e) CdS and CdS/NiS<sub>x</sub> nanohybrids with different Cd/Ni mole ratios: (a) CdS (b) CdS/NiS<sub>x</sub>-1%, (c) CdS/NiS<sub>x</sub>-3%, (d) CdS/NiS<sub>x</sub>-7%, (e) CdS/NiS<sub>x</sub>-10%. (f) XRD patterns of various CdS/NiS<sub>x</sub> nanohybrids.

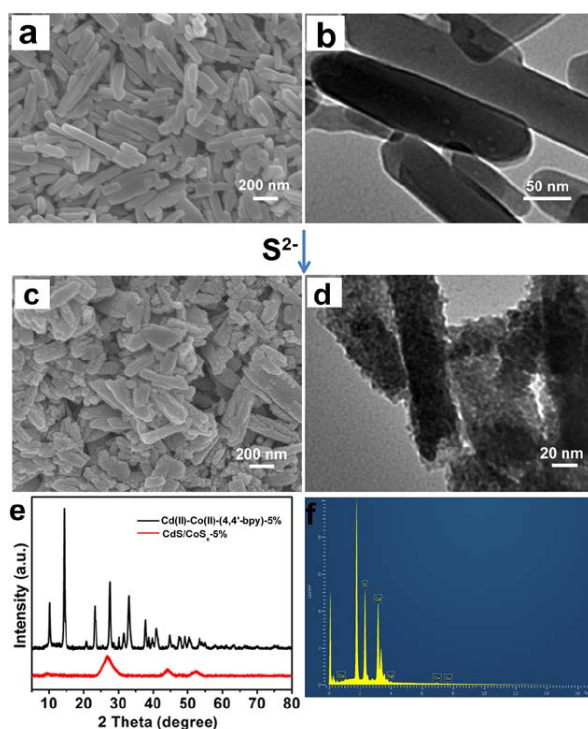

**Fig. S8** (a) SEM image and (b) TEM image of the Cd(II)-Co(II)-(4,4'-bpy)-5% coordination polymer. (c) SEM image, (d) TEM image, (e) XRD pattern and (f) EDX spectrum of the CdS/CoS<sub>x</sub>-5% nanohybrids.

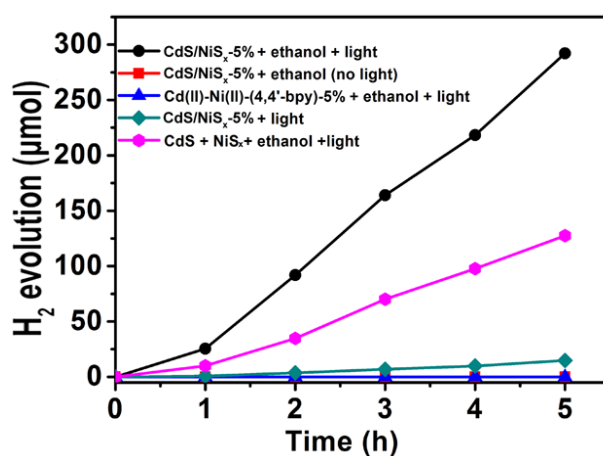

**Fig. S9** Time course of photocatalytic H<sub>2</sub> evolution over various photocatalytic reaction conditions. It was found that a small amount of H<sub>2</sub> was detected when no ethanol was added due to the excess Na<sub>2</sub>S in the suspension can also act as sacrificial reagent for photocatalytic H<sub>2</sub> evolution. These control experiments indicate that light, the photocatalyst (CdS/NiS<sub>x</sub>-5% sample), and the sacrificial agent (ethanol) in this system are all essential for efficient H<sub>2</sub> evolution. The H<sub>2</sub> evolution activity over CdS/NiS<sub>x</sub>-5% photocatalyst is also higher than that of mechanically mixed sample containing CdS and NiS<sub>x</sub> with a similar mole ratio, which was obtained by adding an appropriate portion of NiCl<sub>2</sub> aqueous solution into the Cd(II)-(4,4'-bpy) suspension before adding Na<sub>2</sub>S aqueous solution.

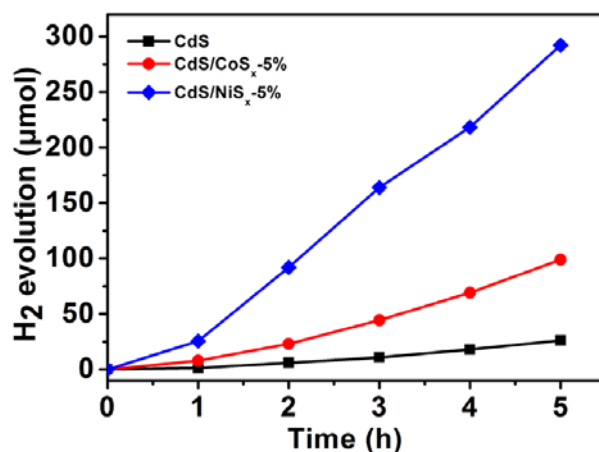

**Fig. S10** Time course of photocatalytic H<sub>2</sub> evolution over various photocatalytic reaction conditions. It was found that the photocatalytic activity of CdS/CoS<sub>x</sub>-5% is higher than that of CdS while lower than that of CdS/NiS<sub>x</sub>-5% photocatalyst.

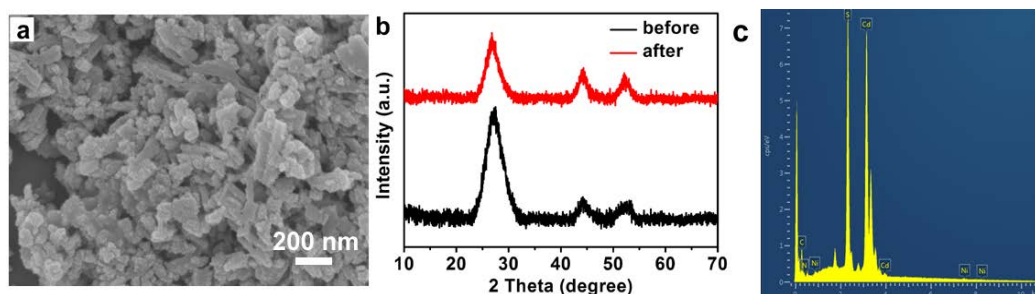

**Fig. S11** (a) SEM image, (b) XRD pattern and (c) EDX spectrum of the CdS/NiS<sub>x</sub>-5% nanohybrid photocatalyst after photocatalytic reaction test.

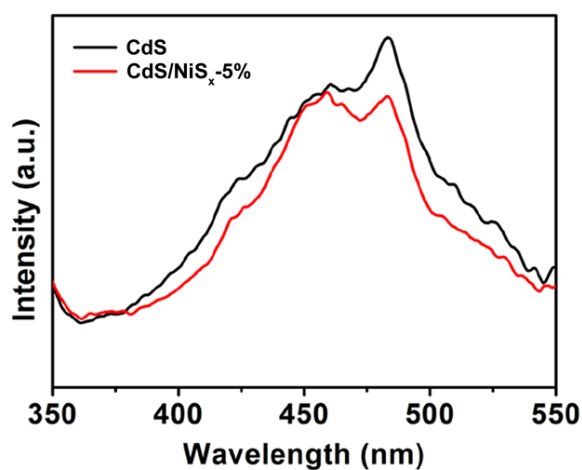

**Fig. S12** Photoluminescence spectra of the CdS and CdS/NiS<sub>x</sub>-5% nanohybrid (excitation wavelength: 330 nm).
